1 Article: Discovery

2

3 Parallel evolution of tobramycin resistance across species and environments

4

5 Michelle R. Scribner, Alfonso Santos-Lopez, Christopher W. Marshall<sup>&</sup>, Christopher Deitrick,

6 and Vaughn S. Cooper

7

8 Department of Microbiology and Molecular Genetics, and Center for Evolutionary Biology and

9 Medicine, University of Pittsburgh, Pittsburgh, Pennsylvania, USA

10 & Current address: Department of Biological Sciences, Marquette University, Milwaukee,

11 Wisconsin, USA

12 Corresponding author: Vaughn Cooper, [vaughn.cooper@pitt.edu](mailto:vaughn.cooper@pitt.edu)

13 **Abstract (241 words)**

14 An important problem in evolution is identifying the genetic basis of how different species adapt  
15 to similar environments. Understanding how various bacterial pathogens evolve in response to  
16 antimicrobial treatment is a pressing example of this problem, where discovery of molecular  
17 parallelism could lead to clinically useful predictions. Evolution experiments with pathogens in  
18 environments containing antibiotics combined with periodic whole population genome  
19 sequencing can be used to characterize the evolutionary dynamics of the pathways to  
20 antimicrobial resistance. We separately propagated two clinically relevant Gram-negative  
21 pathogens, *Pseudomonas aeruginosa* and *Acinetobacter baumannii*, in increasing  
22 concentrations of tobramycin in two different environments each: planktonic and biofilm.  
23 Independent of the pathogen, populations adapted to tobramycin selection by parallel evolution  
24 of mutations in *fusA1*, encoding elongation factor G, and *ptsP*, encoding phosphoenolpyruvate  
25 phosphotransferase. As neither gene is a direct target of this aminoglycoside, both are relatively  
26 novel and underreported causes of resistance. Additionally, both species acquired antibiotic-  
27 associated mutations that were more prevalent in the biofilm lifestyle than planktonic, in electron  
28 transport chain components in *A. baumannii* and LPS biosynthesis enzymes in *P. aeruginosa*  
29 populations. Using existing databases, we discovered both *fusA1* and *ptsP* mutations to be  
30 prevalent in antibiotic resistant clinical isolates. Additionally, we report site-specific parallelism of  
31 *fusA1* mutations that extend across several bacterial phyla. This study suggests that strong  
32 selective pressures such as antibiotic treatment may result in high levels of predictability in  
33 molecular targets of evolution despite differences between organisms' genetic background and  
34 environment.

## 35 **Introduction**

36           The notion that evolution can be forecasted at the level of phenotype, gene, or even  
37 amino acid is no longer a fantasy in the post-genomic era (Lässig et al., 2017). If we  
38 acknowledge that most forecasting efforts rely on history to anticipate the future, the explosive  
39 growth of whole-genome sequencing (WGS) sets the stage to resolve evolutionary phenomena  
40 in action and suggest the next selected path. Among the best examples, bacterial populations  
41 exposed to strong selection like antibiotics and analyzed by WGS are likely to identify gene  
42 regions that produce resistance (Ahmed et al., 2018a; Cooper, 2018; Feng et al., 2016; Palmer  
43 and Kishony, 2013). Repeated instances of the same antibiotic selection may enrich the same  
44 types of mutations and ultimately enable some measure of predictability (Ibacache-Quiroga et  
45 al., 2018; Wong et al., 2012). For instance, we can be confident that exposure of many bacteria  
46 to high doses of fluoroquinolones like ciprofloxacin may select for substitutions in residues 83 or  
47 87 of the drug target, DNA gyrase A (Fàbrega et al., 2009; Wong and Kassen, 2011).  
48 Furthermore, effective prediction of drug resistance phenotypes based on genome sequence  
49 data has been demonstrated for certain bacterial species (Bradley et al., 2015; Tamma et al.,  
50 2019). These predictable outcomes are the product of very strong selection in populations with  
51 ample mutation supply and relatively few single mutations that can achieve high-level resistance  
52 (Ibacache-Quiroga et al., 2018).

53           Yet predicting evolution may be hampered when antibiotic selection produces species or  
54 environment-specific outcomes. Evolution experiments in antibiotics have demonstrated that  
55 subjecting different bacterial strains to the same antibiotic treatment regime (Gifford et al., 2018;  
56 Vogwill et al., 2014, 2016), or the same strains to different environments (Ahmed et al., 2018a;  
57 Santos-Lopez et al., 2019) can select for different drug resistance levels as well as molecular  
58 targets. We can test the extent of predictability of evolved levels and causes of drug resistance  
59 by studying the evolution of resistance in different environments and across different species  
60 that inherently have different genetic backgrounds. Here, we experimentally evolved two

61 bacterial species from different genera, *Acinetobacter baumannii* and *Pseudomonas*  
62 *aeruginosa*, in increasing concentrations of the aminoglycoside tobramycin (TOB) in both  
63 planktonic and biofilm environments. We performed whole population genome sequencing  
64 throughout the history of each replicate lineage to determine their population-genetic dynamics  
65 and identify the molecular targets under selection in each condition.

66 *A. baumannii* and *P. aeruginosa* are ESKAPE pathogens that are responsible for  
67 multidrug-resistant infections (Santajit and Indrawattana, 2016). These species are members of  
68 the Moraxellaceae and Pseudomonadeae families and the strains used differ in their genome  
69 sizes by 2.7Mb, or more than 40%. Infections with these two opportunistic pathogens are often  
70 associated with a biofilm mode of growth (Eze et al., 2018; Mulcahy et al., 2014), where the  
71 bacteria grow in aggregates on surfaces and are protected from antimicrobials by a number of  
72 mechanisms. This biofilm protection may occur from secreted substances like polysaccharides,  
73 proteins, or eDNA that limit diffusion or by slowing growth and rendering the bacteria less  
74 susceptible to an antibiotic (Hall and Mah, 2017; Høiby et al., 2010). Given the lifestyle  
75 differences between cells growing in a biofilm compared to free-living cells, we asked whether  
76 evolution of TOB resistance could proceed by different mechanisms between these two  
77 environments. TOB is commonly used to treat infections caused by Gram-negative pathogens,  
78 and as an aminoglycoside can kill bacteria by multiple mechanisms (Bulitta et al., 2015).

79 Aminoglycosides are actively transported into the cell following binding to the outer membrane,  
80 and subsequently can cause cell death by binding the 30S ribosome and blocking translation  
81 (Kohanski et al., 2010). They have also been shown to kill by binding to the outer membrane  
82 (Bulitta et al., 2015), and induce killing of cells that are not actively dividing (McCall et al., 2019).

83 In addition to identifying the range of molecular mechanisms of resistance available in  
84 these species and environments, we aimed to examine the evolutionary dynamics of adaptation  
85 in the presence of TOB. The success of the available molecular mechanisms of resistance is  
86 determined by the order in which causative mutations occurred (Wistrand-Yuen et al., 2018), the

87 fitness imposed by those mechanisms (MacLean and Buckling, 2009), and the combinations of  
88 these mutations that are selectively tolerated (Knopp and Andersson, 2018). We used whole-  
89 population genome sequencing at regular intervals as we increased antibiotic concentrations to  
90 determine how selected mutations interact with the external environment and with one another,  
91 either competing on different haplotypes or combining in the same genotype.

92

## 93 **Results**

94 We used TOB-sensitive ancestral clones of *A. baumannii* ATCC 17978 and *P.*  
95 *aeruginosa* strain PA14 to inoculate five replicate, single-species lineages for each of four  
96 treatments: planktonic without drug, planktonic with drug, biofilm without drug, and biofilm with  
97 drug. We propagated populations for twelve days and periodically froze samples for later  
98 sequencing and phenotypic analysis. The experimental design is illustrated in Figure 1A and 1B.

### 99 **Parallel evolution of TOB resistance phenotypes and genotypes**

100 For a population to survive to the end of the experiment, it must evolve resistance to at  
101 least four times (4x) the TOB concentration that would kill the ancestral clone. Previous  
102 evolution experiments in antibiotics show that replicate populations may acquire different levels  
103 of resistance in response to the same antibiotic treatment regime when evolving in different  
104 environments (Gifford et al., 2018; Santos-Lopez et al., 2019; Trampari et al., 2019). While  
105 resistance levels did not change during the experiment for populations not exposed to  
106 antibiotics, populations that evolved with antibiotic selection survived TOB concentrations 8-  
107 21.3x MIC of the ancestral clone (Figure 1C and 1D).

108 Screens of transposon mutant libraries have identified 135 genes associated with low  
109 level resistance to aminoglycosides, suggesting that TOB resistance might arise by mutations in  
110 various molecular targets (Schurek et al., 2008). Instead, whole genome sequencing of the  
111 twenty TOB-treated populations at day twelve revealed that mutations in only a few loci rose to  
112 high frequencies (Figure 2, Figure S2). The large effective population sizes ( $>10^7$ ) of these

113 experiments ensure that mutations occurred in nearly every position across the genome, and  
114 often multiple times (Santos-Lopez et al. 2019, Cooper, 2018). Therefore, the mutations  
115 identified by population-wide WGS, which in our case detect only those  $\geq 5\%$  frequency,  
116 represent the fittest resistance mutations of many contenders. The finding that mutations in the  
117 same genes evolved in parallel across antibiotic-treated populations (Figure 2) provides clear  
118 evidence of strong selection for their fitness benefits in the presence of TOB, and their absence  
119 in drug-free populations indicates they were not simply selected by other experimental  
120 conditions (Figure S2). In the unlikely possibility that these particular loci experienced  
121 significantly higher mutation rates in the presence of TOB, only selection would have driven  
122 them to these frequencies within 3-12 days (Cooper, 2018).

123         Despite the many differences between *A. baumannii* and *P. aeruginosa*, both species  
124 frequently acquired mutations in *fusA1* and *ptsP* (Figure 2). The *fusA1* gene encodes elongation  
125 factor G (EF-G), an essential protein which functions in catalyzing translocation and ribosome  
126 recycling during translation (Savelsbergh et al., 2009). While *A. baumannii* has one copy of  
127 *fusA1*, *P. aeruginosa* and other *Pseudomonas* species also harbor an additional copy encoded  
128 by the gene *fusA2* (Palmer et al., 2013). EF-G is not known to be a direct binding target of TOB,  
129 and has received little attention as a mechanism of resistance to aminoglycosides in these  
130 species (Bolard et al., 2017; Sanz-García et al., 2018). However, this protein is the direct  
131 binding target of other antibiotics including fusidic acid and argyrisin B (Johanson and Hughes,  
132 1994; Jones et al., 2017). The exact mechanism by which mutations in EF-G confer  
133 aminoglycoside resistance is currently unknown but this study demonstrates it is an important  
134 resistance determinant. The *ptsP* gene encodes phosphoenolpyruvate phosphotransferase  
135 protein, which is part of the nitrogen phosphotransferase system and has previously been  
136 identified as a target of aminoglycoside resistance for *P. aeruginosa*, but not *A. baumannii*  
137 (Sanz-García et al., 2018; Schurek et al., 2008). The mechanism by which mutations in *ptsP*  
138 may confer resistance to TOB is also unknown, although the nitrogen phosphotransferase

139 system has been shown to regulate expression of genes responsible for coordinating the  
140 antibiotic stress response, suggesting an indirect link between the nitrogen phosphotransferase  
141 system and antibiotic resistance (Gebhardt and Shuman, 2017). Therefore, despite as many as  
142 135 genes in which mutations confer reduced susceptibility, mutations in these two genes *fusA1*  
143 and *ptsP* appear to be most fit in the presence of TOB across species and environments.

144 To clarify the specific effects of these mutations in TOB resistance, isogenic mutants  
145 were obtained by isolating clones from evolved *P. aeruginosa* populations and genotyping them  
146 by WGS. Two isogenic *fusA1* clones (N592I, Q678L), and *ptsP* clones ( $\Delta$ 14bp, 1296-1309,  
147  $\Delta$ 42bp, 1846-1887) were isolated and their resistance profiles measured. All were an average  
148 fourfold more resistant to TOB than the ancestral clone (Figure S3A). We also tested if  
149 mutations in *fusA1* increased the MIC to other ribosome-targeting antibiotics. These mutants  
150 were 2-4x more resistant to including amikacin, gentamycin, and tigecycline than the ancestor.  
151 Mutations in *ptsP* did not produce cross resistance to other antibiotics tested (Figure S3B),  
152 suggesting specificity to TOB resistance. While species-specific mutations did occur in *cyoA*,  
153 *cyoB*, *orfK*, *orfH*, *orfL*, and *orfN* as discussed below, the parallel evolution of mutations in *fusA1*  
154 and *ptsP* across *A. baumannii* and *P. aeruginosa* indicate that regardless of genetic  
155 background, these are among relatively few loci in which mutations can jointly increase TOB  
156 resistance and fitness in these conditions.

### 157 **Environment-associated adaptations to TOB selection**

158 Experimental evolution in both planktonic and biofilm conditions allows us to test if the  
159 genetic pathways of adaptation depend on the external environment. TOB selection enriched  
160 multiple mutations in *fusA1* within each population regardless of the environment, but their  
161 frequencies differed with lifestyle. For *P. aeruginosa*, *fusA1* mutations dominated biofilm  
162 populations in the final sample (95.4% $\pm$ 3.7) but their frequencies varied in planktonic  
163 populations (50.4% $\pm$ 25.7) (Figure 2). Mutations in *ptsP* were prevalent in planktonic populations

164 but only one biofilm population contained a *ptsP* mutation at day twelve. Rather, these biofilm  
165 populations of *P. aeruginosa* biofilm populations frequently acquired mutations in *orfK*, *orfH*,  
166 *orfL*, or *orfN* genes (subsequently referred to jointly as *orfKHLN*), encoding O antigen  
167 biosynthesis enzymes, whereas this locus was only mutated in one of the planktonic  
168 populations (Burrows et al., 1996; Rocchetta et al., 1999). A mutation in *orfK* also occurred in a  
169 population with biofilm but no TOB selection, suggesting that *orfKHLN* mutations may be  
170 beneficial in both biofilm and TOB selection alone, but most beneficial in the combination of  
171 these conditions (Figure 2).

172 The genetic targets of resistance were more consistent in *A. baumannii* populations  
173 treated with TOB, with *fusA1* and *ptsP* mutations reaching similar frequencies in both biofilm  
174 and planktonic treatments by the end of the experiment. However, mutations in *cyoA* and *cyoB*  
175 (subsequently referred to jointly as *cyoAB*), encoding components of the electron transport  
176 chain, were associated with only biofilm lineages (Figure 2) (Ibacache-Quiroga et al., 2018).  
177 Together, the mutations enriched in biofilm lineages (*orfKHLN*, *cyoAB*) indicate that lifestyle  
178 may influence the identity of targets under selection by TOB or their frequency (*fusA1*, *ptsP*).

179 The parallel evolution of mutations in four genes associated with O antigen biosynthesis  
180 within and between populations strongly suggests that the outer membrane may be altered in  
181 response to TOB and biofilm selection in *P. aeruginosa* (Burrows et al., 1996; Tognon et al.,  
182 2017; Wong et al., 2012). Experiments in strain PAO1 have shown that loss of B band O  
183 antigen is associated with aminoglycoside resistance by increasing impermeability and reducing  
184 binding affinity to the outer membrane (Bryan et al., 1984; Kadurugamuwa et al., 1993).  
185 Similarly, populations of *A. baumannii* evolved with TOB and biofilm selection acquired  
186 mutations in the *cyoAB* operon, encoding components of the electron transport chain. Mutations  
187 in electron transport chain components have previously been associated with resistance to  
188 aminoglycosides through increased membrane impermeability (Bryan and Kwan, 1983; Damper  
189 and Epstein, 1981; Schurek et al., 2008). Therefore, although the biofilm-associated mutations



190 in the two species propagated in this experiment evolved mutations in different genetic loci  
191 (affecting LPS biosynthesis genes in *P. aeruginosa* and electron transport chain components in  
192 *A. baumannii*), these may represent parallelism in a broad strategy of altered membrane  
193 structure or permeability that is most beneficial under both biofilm and aminoglycoside selection.

#### 194 **Population-genetic dynamics of TOB resistance evolution**

195 We used longitudinal population sequencing of three lineages per treatment to  
196 determine effects of species and environment on the population-genetic dynamics of adaptation  
197 to the antibiotic. The trajectories of allele frequencies (shown in Figure S4) were used to predict  
198 mutation linkage and hence the assembly and dynamics of genotypes, which are represented  
199 by Muller plots (Figure 3, see methods). Genotype frequency is represented by the breadth of  
200 shading with colors corresponding to the putative driver mutations of that genotype. In all  
201 lineages, regardless of environment, mutations in *fusA1* were detected at either 0.5x MIC or  
202 1.0x MIC and subsequently rose to high frequencies (Figure 3, red). Their rapid rise in  
203 frequency in the first few days of the experiment suggests that *fusA1* mutations were the fittest  
204 contending mutations at subinhibitory concentrations of TOB. Lineages with different SNPs in  
205 the *fusA1* gene coexisted in some populations for the duration of the experiment, suggesting  
206 that different *fusA1* genotypes had similar fitness in increasing TOB. While a single, selected  
207 nonsynonymous *fusA1* mutation was presumably sufficient for survival to the end of the  
208 experiment due to the presence of clones with no other mutations at day twelve (Supplementary  
209 Data), secondary mutations were selected in these genotypes in the genes discussed  
210 previously (*ptsP*, *orfKHLN*, and *cyoAB*, Figure 3). *A. baumannii* populations tended to become  
211 dominated by *fusA1+ptsP* genotypes, but biofilm populations also selected *cyoAB* mutants prior  
212 to day nine (up to 2x MIC) that were outcompeted by a *fusA1+ptsP* genotype at 4x MIC TOB.  
213 Planktonic populations of *P. aeruginosa* demonstrated coexistence of *fusA1*, *ptsP*, and  
214 *fusA1+ptsP* haplotypes throughout the experiment, rather than a sweep of a *fusA1+ptsP*  
215 genotype (Figure 3). In contrast, *P. aeruginosa* biofilm populations repeatedly selected *orfKHLN*

216 mutants on a *fusA1* background. These evolutionary dynamics demonstrate that following initial  
217 selection of a *fusA1* mutation, selection favored secondary mutations particular to lifestyle and  
218 species.

## 219 **Parallelism of aminoglycoside resistance mechanisms across species and clinical** 220 **isolates**

221 The repeated evolution of *fusA1* and *ptsP* mutations in both *P. aeruginosa* and *A.*  
222 *baumannii* suggested that these mutations may provide a general mechanism of TOB  
223 resistance across diverse species. We tested this hypothesis by searching published datasets  
224 and genomes for *fusA1*, *ptsP*, *cyoA*, and *cyoB* mutations (Methods). Mutations in *fusA1* were  
225 found in several different species including *E. coli*, *S. typhimurium*, and *S. aureus* (Ibacache-  
226 Quiroga et al., 2018; Jahn et al., 2017; Johanson and Hughes, 1994; Kim et al., 2014; Mogre et  
227 al., 2014; Norström et al., 2007), and all laboratory studies reported these mutations either in  
228 response to aminoglycoside selection or as a direct cause of aminoglycoside resistance (Figure  
229 4). Mutations in *cyoA* and *cyoB* were also found in *E. coli* and *S. typhimurium* in these  
230 experiments (Ibacache-Quiroga et al., 2018; Jahn et al., 2017; Johanson and Hughes, 1994).  
231 Multiple sequence alignment of these genes across species revealed that *fusA1* mutations were  
232 localized to two primary regions across all species and were primarily nonsynonymous SNPs,  
233 and eight positions exhibit amino acid-level parallelism across species (Figure 4, Table S1,  
234 Figure S5) (Wattam et al., 2017). In this dataset, mutations occurred at positions with identical  
235 amino acids across species more frequently than expected by chance for *fusA1* ( $\chi^2 = 11.58$ ,  $df =$   
236  $1$ ,  $p = 0.0006$ ), *ptsP* ( $\chi^2 = 4.37$ ,  $df = 1$ ,  $p = 0.03652$ ), and *cyoA* ( $\chi^2 = 3.89$ ,  $df = 1$ ,  $p = 0.0486$ ).  
237 The parallel evolution of *fusA1* mutations across species and environments demonstrates the  
238 potential utility of this gene as a predictive marker of aminoglycoside resistance.

239 To examine if the precise mutations found in our *in vitro* study were also found in clinical  
240 isolates, we searched published genomes of *P. aeruginosa* clinical isolates from cystic fibrosis

241 patients who had likely been treated with aminoglycosides like TOB (Bolard et al., 2017; Chung  
242 et al., 2012; López-Causapé et al., 2017, 2018; Markussen et al., 2014). We identified *fusA1*  
243 and *ptsP* mutations in these genomes, suggesting that these mutations evolve during infections.  
244 Although it is not possible to distinguish aminoglycoside selection as the driver of these  
245 mutations in a clinical setting, the selection of mutations in these genes in our evolution  
246 experiment and the increased resistance that these mutations have the same effect *in vivo*.  
247 Taken together, the parallel evolution of mutations in these genes in clinical isolates of a wide  
248 range of species indicates they commonly contribute to aminoglycoside resistance in diverse  
249 environments, including the cystic fibrosis respiratory tract.

250

## 251 **Discussion**

252 The rapidly intensifying problem of antimicrobial resistance demands understanding of  
253 how antibiotic resistance evolves and which types of mutations or mobile elements are common  
254 causes (Brockhurst et al., 2019). Genetic screens of mutant collections have revealed potential  
255 resistance mechanisms (Schurek et al., 2008), and more recently, evolve-and-resequence  
256 experiments have been used to identify the most fit resistance mutations in a given condition  
257 (Santos-Lopez et al., 2019; Sanz-García et al., 2018; Wong et al., 2012). However, the broader  
258 clinical utility of these screens for predicting the evolution of antibiotic resistance depends upon  
259 the relevance of the findings in other genetic backgrounds or environments. This study served  
260 the dual purpose of identifying mutations that contribute to TOB resistance in *A. baumannii* and  
261 *P. aeruginosa* and demonstrating effects of different environments and species history on  
262 evolutionary dynamics and causes of resistance.

263 Because antibiotics often induce cell killing by targeting conserved domains of proteins  
264 involved in essential cell processes, there is potential for mutations in these genes to confer  
265 resistance in diverse bacterial strains and species. However, many have appreciated that  
266 epistatic interactions stemming from differing genetic backgrounds could limit parallel evolution

267 of resistance mechanisms (Breen et al., 2012; MacLean et al., 2010; Ward et al., 2009). In spite  
268 of the many genetic differences between *A. baumannii* and *P. aeruginosa* – the latter genome  
269 much larger and containing dozens of additional putative resistance loci – we identified parallel  
270 mutations in *fusA1* and *ptsP* in response to tobramycin selection, a largely unknown  
271 combination of mutations conferring high fitness and resistance. Furthermore, we found amino  
272 acid-level parallelism of *fusA1* mutations associated with aminoglycoside resistance, including  
273 kanamycin, gentamycin, and amikacin, across diverse species including *E. coli*, *S. typhimurium*,  
274 and *S. aureus* (Figure 4, Figure S5). Our finding that *fusA1* mutations repeatedly evolve in  
275 clinical *P. aeruginosa* isolates from different strain types and host conditions further supports the  
276 notion that these mutations can arise in a range of genetic backgrounds and environments, and  
277 we predict that *fusA1* mutations may be considerably more prevalent following antibiotic therapy  
278 than previously appreciated. These *fusA1* mutations also produced cross resistance to other  
279 ribosome-targeting antibiotics, a concerning finding given the frequent use of tobramycin in  
280 treating infections of the CF airway (Figure S3) (Chmiel et al., 2014).

281       Tobramycin selection in a biofilm model of growth demonstrably altered the targets of  
282 selection in ways that motivate studies of the mechanism of aminoglycoside killing in this  
283 lifestyle. The rise of mutations in LPS biosynthesis genes (*orfKHLN*) and electron transport  
284 chain components (*cyoAB*) primarily in biofilm populations indicates that altered binding or cell  
285 permeability may have been selected and can indicate a distinct mode of action of TOB. These  
286 lifestyle distinctions in resistance traits suggest that the environment may influence the  
287 evolutionary dynamics of antimicrobial resistance, in concordance with previous studies (Ahmed  
288 et al., 2018b; Santos-Lopez et al., 2019; Trampari et al., 2019). Therefore, while genes like  
289 *fusA1* represent mechanisms of resistance that are robust across a wide range of species,  
290 environments, and host conditions, the prevailing mode of bacterial growth is likely crucial in  
291 attempting to predict the evolution of antimicrobial resistance.

292           The extent of parallelism in molecular evolution in these experiments is surprising and its  
293 causes need to be considered. Why would widely different species evolve to resist tobramycin  
294 by *fusA1* mutations, and to a lesser extent *ptsP* mutations, when many causes of  
295 aminoglycoside resistance are likely available (Schurek et al., 2008)? Several possible  
296 explanations exist that are not mutually exclusive. One possibility is that these genes possess a  
297 high local mutation rate and thus acquire mutations more rapidly than other available molecular  
298 targets of resistance. However, it is doubtful that these mutations are more available than  
299 others, since neither were enriched in studies of mutations accumulated in the near-absence of  
300 selection nor are these loci in genome regions shown to have higher mutation rates (Dettman et  
301 al., 2016; Long et al., 2014). More likely is that mutations to *fusA1* and *ptsP* simply produce the  
302 greatest fitness benefit in these conditions and these fitness benefits are robust to different  
303 species and environments. Other drugs may have a wider range of targets that produce the  
304 same level of fitness benefit, resulting in less parallelism. The target size of these genes, in  
305 which multiple nonsynonymous mutations produce resistance, may also contribute to gene-level  
306 parallelism across populations: with a larger proportion of available beneficial mutations at these  
307 concentrations of tobramycin, gene-level parallelism in *fusA* and *ptsP* may be more likely.

308           Another cause of molecular parallelism is that when the fittest available molecular  
309 targets of resistance are in highly conserved genes, such as *fusA1* (Savelsbergh et al., 2009),  
310 mutations in these loci may be predictable across otherwise highly divergent species.  
311 Conversely, if a strain gains a highly fit resistance mechanism using genes that are not  
312 conserved, gene-level parallelism with other strains is not possible and the target predictability  
313 diminished. The exact mechanism by which alterations in elongation factor G produce  
314 resistance is not known, but have been suggested to produce structural changes that could  
315 interfere with aminoglycoside binding (Bolard et al., 2017). Nonetheless, the nucleotide-level  
316 parallelism we have observed suggest that the effect of these changes may be conserved  
317 across species and inform the molecular mechanism of resistance. The finding of *fusA1*

318 mutations across species also suggests that these mutations may have relatively low epistatic  
319 interactions with the genetic background of the strain. Predictability may be more challenging if  
320 epistatic effects of resistance alleles are greater.

321         Several studies of experimentally evolved microbial populations have demonstrated a  
322 general “rule of declining adaptability”, whereby beneficial mutations produce diminishing fitness  
323 benefits as a population becomes better adapted to its environment (Kryazhimskiy et al., 2014;  
324 Wang et al., 2016). These studies have experimentally determined that populations exhibit  
325 global diminishing returns epistasis, in which the relative fitness level of different strains in an  
326 environment influences the fitness effect of a given mutation more than the specific genetic  
327 differences between the strains. Our study is consistent with this model: *A. baumannii* and *P.*  
328 *aeruginosa* are highly unfit in the TOB concentrations utilized in this study and exhibit similar  
329 benefits from *fusA1* and *ptsP* mutations despite genetic differences in the ancestral genotypes.  
330 Theory suggests that if these strains were more fit in these conditions, for example if they were  
331 more resistant to the TOB concentrations in which they are growing, *fusA1* and *ptsP* mutations  
332 may be less beneficial and thus evolution less predictable. In other antibiotic or species  
333 combinations, it remains to be seen if effects of resistance mutations are heavily skewed toward  
334 a few that are most fit and whether subsequent resistance mutations exhibit diminishing returns  
335 that weaken selection and increase variation among populations.

336         In this study we have identified gene and nucleotide level parallelism of molecular  
337 targets of tobramycin resistance across species, environments, and clinical isolates. While  
338 environmental and genetic differences are crucial factors influencing the evolutionary dynamics  
339 of resistance, this parallelism indicates that the strong selective pressures produced by  
340 antibiotics may result in strikingly predictable targets of molecular evolution in certain drugs and  
341 species combinations.

342

343 **Methods**

## 344 **Strains and Media**

345 *Pseudomonas aeruginosa* strain UCBPP-PA14 and *Acinetobacter baumannii* strain  
346 ATCC 17978 were the ancestral strains used in the evolution experiments (Baumann et al.,  
347 1968; Piechaud and Second, 1951; Rahme et al., 1995). *A. baumannii* ATCC 17978 was  
348 propagated for ten days in minimal media to pre-adapt it to the media conditions prior to the  
349 evolution experiment. The minimal media used in the evolution experiments consisted of an M9  
350 salt base (0.37 mM CaCl<sub>2</sub>, 8.7 mM MgSO<sub>4</sub>, 42.2 mM Na<sub>2</sub>HPO<sub>4</sub>, 22 mM KH<sub>2</sub>PO<sub>4</sub>, 21.7mM NaCl,  
351 18.7 mM NH<sub>4</sub>Cl), 0.2 g/L glucose, 20 mL/L MEM essential amino acid solution, 10 mL/L MEM  
352 nonessential amino acid solution (Thermofisher 11130051, 11140050), and 1 mL/L each of  
353 Trace Elements A, B, and C (Corning 99182CL, 99175CL, 99176CL). In addition, DL-lactate  
354 (Sigma-Aldrich 72-17-3) was added to the *P. aeruginosa* medium to a final concentration of  
355 10mM in order to generate the approximate nutrient concentrations present in the cystic fibrosis  
356 lung environment (Palmer et al., 2007).

## 357 **Evolution Experiment**

358 Evolution experiments in both *P. aeruginosa* and *A. baumannii* were initiated using a  
359 single ancestral clone. For *P. aeruginosa*, a single colony was selected and resuspended in  
360 PBS, then used to inoculate twenty replicate lineages. For *A. baumannii*, a single colony was  
361 selected and grown in minimal medium with no antibiotic for 24 hours, then used to inoculate  
362 twenty replicate lineages. Lineages were propagated with either increasing concentrations of  
363 TOB or no TOB and either planktonic or biofilm selection, such that five replicate lineages each  
364 were propagated for four experimental conditions (planktonic without TOB, planktonic with TOB,  
365 biofilm without TOB, and biofilm with TOB) for each organism. Lineages with planktonic  
366 selection were propagated through a 1:100 dilution every 24 hours (50uL into 5mL of fresh  
367 minimal media), and lineages with biofilm selection were propagated through a transferring a  
368 colonized polystyrene bead (Cospheric, Santa Barbara, CA) to a tube of fresh media and three  
369 fresh beads every 24 hours, as described previously (Poltak and Cooper, 2011). *P. aeruginosa*

370 biofilm transfers were performed by transferring a bead directly to the next day's tube, whereas  
371 *A. baumannii* biofilm transfers were performed by first rinsing the bead by transferring it to a  
372 tube of PBS, then to the next day's tube. Lineages propagated with antibiotic selection were  
373 treated with tobramycin sulfate (Alfa Aesar, Wardhill, MA) starting at 0.5X MIC of the ancestral  
374 strain in the experimental minimal media (0.5 mg/L for *A. baumannii* and 2.0 mg/L for *P.*  
375 *aeruginosa*), with doubling of the concentration every 72 hours. The experiment was performed  
376 for twelve days, with samples collected on days 3, 4, 6, 7, 9, 10, and 12 and frozen at -80°C in  
377 either 25% glycerol for *P. aeruginosa* or 9% DMSO for *A. baumannii*. Planktonic lineages were  
378 sampled by freezing an aliquot of the liquid culture, and biofilm lineages by sonicating a bead in  
379 PBS and freezing an aliquot of the resuspended cells.

### 380 **Minimum Inhibitory Concentration Assays**

381 We determined MICs by broth microdilution in Mueller Hinton Broth according to Clinical  
382 Laboratory Standards Institute guidelines (CLSI, 2019). To measure MIC's for evolved  
383 populations, we revived frozen populations by streaking onto a ½ T-Soy agar plate,  
384 resuspended a portion of the resulting bacterial lawn in PBS, and diluted to a 0.5 McFarland  
385 standard. We inoculated the suspension into a round bottom 96 well plates containing two-fold  
386 dilutions of TOB at a final concentration of  $5 \times 10^5$  CFU/mL. *P. aeruginosa* and *A. baumannii* MIC  
387 assays were then incubated at 37°C for 16-20 hours or 18-22 hours, respectively, then the MIC  
388 was determined as the first well that showed no growth. At least three assays were performed  
389 for each population. In *P. aeruginosa*, MICs of TOB differed when measured in Muller Hinton  
390 Broth compared to the experimental minimal medium but reflect similar fold changes in MIC  
391 relative to the ancestral clone (Figure S1). Clones were measured by the same procedure with  
392 the exception that freezer stocks were streaked for isolation and MIC assays were performed  
393 using an isolated colony. MICs of other ribosome-targeting antibiotics for the *fusA1* and *ptsP*



394 isogenic mutants were performed using Sensititre plates according to manufacturer  
395 specifications (Sensititre GN3F, Trek Diagnostics Inc., 514 Westlake, OH).

### 396 **Genome Sequencing and Analysis**

397 Whole populations were sequenced periodically throughout the experiment. For TOB-  
398 treated lineages, all populations were sequenced on day 12, and 3 lineages from each of the  
399 planktonic and biofilm conditions were also sequenced on days 3, 4, 6, 7, 8, 9, and 10 for *P.*  
400 *aeruginosa* and days 1, 3, 4, 6, 7, 9, 10, and 12 for *A. baumannii*. Three no TOB lineages from  
401 each of the biofilm and planktonic conditions were also sequenced on days 6 and 12 for *P.*  
402 *aeruginosa* and days 1, 4, 9, and 12 for *A. baumannii*.

403 Populations were prepared for sequencing by inoculating freezer stocks of the bacterial  
404 populations into the same media and antibiotic concentration in which the population was growing  
405 in at the time of freezing. Identical growth conditions to the population's growth conditions at the  
406 time of freezing were maintained in order to minimize bias in the population structure during the  
407 outgrowth process. After 24 hours of growth, populations were sampled by either removing an  
408 aliquot of the culture for planktonic populations or transferring beads to PBS, sonicating, and  
409 removing an aliquot of the resuspended cells for biofilm populations. DNA was extracted using  
410 the DNeasy Blood and Tissue Kit (Qiagen, Hiden, Germany). The sequencing library was  
411 prepared as described by Turner and colleagues (Turner, Marshall et al. 2018) according to the  
412 a previously described protocol (Baym et al., 2015) using the Illumina Nextera kit (Illumina Inc.,  
413 San Diego, CA) and sequenced using an Illumina NextSeq500. Samples were sequenced to 160x  
414 coverage on average for *P. aeruginosa* populations and 309x coverage on average for *A.*  
415 *baumannii* populations.

416 Sequences were trimmed using the Trimmomatic software v0.36 (Bolger, Lohse et al.  
417 2014) with the following criteria: LEADING:20 TRAILING:20 SLIDINGWINDOW:4:20  
418 MINLEN:70. The breseq software v0.31.0 was used to call variants using the default parameters  
419 and the -p flag when analyzing population sequences. These parameters call mutations only if

420 they are present at least 5% frequency within the population and are in at least 2 reads from  
421 each strand. The *A. baumannii* ATCC 17978-mff genome (NZ\_CP012004) and plasmid  
422 NZ\_CP012005 sequences were downloaded from RefSeq. Two additional plasmids were found  
423 to exist in our working strain and were added to this reference genome: NC009083 and  
424 NC\_009084. The *P. aeruginosa* UCBPP-PA14 genome was downloaded from RefSeq  
425 (NC\_008463). Mutations were removed if they were also found in the ancestor's sequence  
426 when mapped to the reference genome. Mutations that did not reach at least 25% cumulative  
427 frequency across all populations at all timepoints were removed, and mutations were also  
428 manually curated to remove biologically implausible mutations. A mutation was determined  
429 biologically implausible if it occurred either *i*) at trajectories that were not possible given the  
430 trajectories of the putative driver mutations, *ii*) at only the ends of reads, only reads with many  
431 other mutations, or at only low coverage (<10 reads), indicating poor read mapping at that  
432 region. When high-quality mutations in loci related to the putative driver loci or ribosome  
433 machinery were reported in New Junction Evidence by breseq, these mutations were also  
434 included in the analysis. Mutations fitting these criteria included mutations to 23S rRNA in *P.*  
435 *aeruginosa*, and mutations to *ptsP*, HPr, and NADH quinone oxidoreductase in *A. baumannii*.  
436 Filtering, allele frequencies, and plotting were done in R v3.5.3 ([www.r-project.org](http://www.r-project.org)) with the  
437 packages ggplot2 v2.2.1 (<https://CRAN.R-project.org/package=ggplot2>) and tidyr  
438 (<https://CRAN.R-project.org/package=tidyr>). Muller plots were generated using the  
439 muller\_diagrams package by CD ([https://github.com/cdeitrick/muller\\_diagrams](https://github.com/cdeitrick/muller_diagrams)) v0.5.2 using  
440 default parameters. These scripts predict genotypes and lineages based on the trajectories of  
441 mutations over time using a hierarchical clustering method and implement filtering criteria to  
442 eliminate singletons that do not comprise prevalent genotypes. Muller plots were manually color  
443 coded by the presence of putative driver mutations within each genotype. Additional mutations  
444 that occurred on the background of putative driver mutations can be viewed in the allele  
445 frequency plots but were not shown in Muller plots (Figure 3, Figure S3).

## 446 **Resistance Loci Alignment and Mutation Mapping**

447 Mutations in putative resistance loci (*fusA1*, *ptsP*, *cyoA*, and *cyoB*) were identified in previous  
448 literature reporting that these mutations arose in response to aminoglycoside selection or  
449 directly conferred an increase in aminoglycoside resistance by MIC assay. Amino acid  
450 sequences of the encoded proteins for these species were obtained by searching the “Features”  
451 section of PATRIC for these genes in the genomes specified in these experiments (Wattam et  
452 al., 2017). The amino acid sequences were aligned in PATRIC and mutations reported in each  
453 study were mapped to the corresponding position in the sequence alignment (Figure 4).  
454 Mutations in these genes in clinical isolates were found by searching for whole genome  
455 sequencing studies of *P. aeruginosa* isolates from cystic fibrosis patients that reported these  
456 mutations. We tested whether the SNPs identified in each of these genes occur in conserved  
457 positions more frequently than expected considering the frequency of conserved positions within  
458 the genes using a Pearson’s Chi-squared test (Figure S5).

459

## 460 **Acknowledgments and Funding Sources**

461 We thank Daniel Snyder and the Microbial Genome Sequencing center (MiGS) for technical  
462 support. This work was supported by the Institute of Allergy and Infectious Diseases at the  
463 National Institutes of Health (grant U01AI124302 and grant T32AI049820) and by the Cystic  
464 Fibrosis Foundation Research Development Program.

465

## 466 **Figure 1. Parallel evolution of tobramycin resistance level across species and**

467 **environment.** Populations of *A. baumannii* and *P. aeruginosa* were propagated in minimal  
468 media with either increasing concentrations of tobramycin or no drug and either planktonic or  
469 biofilm lifestyle. Five replicate populations were propagated per treatment. **(A)** Populations were  
470 either propagated for twelve days in no antibiotic or inoculated into half the minimum inhibitory  
471 concentration of tobramycin with doubling concentrations every 72 hours. Samples of each

472 population were archived for later phenotypic analysis and sequencing periodically throughout  
473 the experiment (red arrows). **(B)** Populations were propagated with either selection for  
474 planktonic growth through a daily 1:100 dilution or biofilm growth through a daily bead transfer  
475 that forces cells to undergo the entire biofilm lifecycle of attachment, growth, dispersion and  
476 reattachment every 24 hours as described in previous work (Poltak and Cooper, 2011). **(C)**.  
477 Tobramycin resistance level relative to the ancestral clone for three randomly chosen  
478 populations per treatment after twelve days of evolution. MICs were determined by microdilution  
479 in Mueller Hinton Broth according to CLSI guidelines. The mean of at least three replicate MIC  
480 assays per population is shown and error bars represent SEM. *A. baumannii* ancestral MIC =  
481 1.0 mg/L, *P. aeruginosa* ancestral MIC = 0.5 mg/L in Mueller Hinton Broth. Populations must  
482 acquire resistance to 4x the MIC of the ancestral strain in order to survive the experiment (gray  
483 dashed line).

484

485 **Figure 2. Population sequencing reveals interspecies parallelism and lifestyle-**  
486 **dependence of molecular targets of evolution.** Tobramycin-associated mutations identified  
487 by whole population genome sequencing of *A. baumannii* and *P. aeruginosa*. Five populations  
488 per treatment were sequenced after 12 days of experimental evolution. Shading indicates the  
489 total frequency of all mutations in each gene within a population at day twelve.

490

491

492 **Figure 3. Evolutionary dynamics of bacterial populations in increasing concentrations of**  
493 **tobramycin.** Muller diagrams displaying genotype frequencies as a proportion of the population  
494 throughout twelve days of evolution for three populations per treatment. Genotypes are shaded  
495 by the putative driver loci that are mutated. Different lineages of the same color represent  
496 mutations at different positions within the same loci that are coexisting within the population.  
497 The frequency of genotypes at every time point is represented by the height of the graph that it

498 spans at that time point. In situations where a first mutation arises in the background of the  
499 ancestral genotype, the color representing that genotype can be seen beginning from the white  
500 background, whereas in situations where a mutation arises in the background of another  
501 mutation, thus generating a new genotype, the new color arises in the middle of the existing  
502 genotype. Mutations occurring in the background of putative driver mutations are not shown but  
503 may be viewed in linear allele frequency plots of each population in Figure S4.

504

505 **Figure 4. Parallelism of mutations in genetic loci associated with aminoglycoside**

506 **resistance across species and clinical isolates.** All mutations that occurred at any point in  
507 the experiment within the *fusA1*, *ptsP*, *cyoA*, or *cyoB* genes are indicated by a symbol at its  
508 position within the encoded amino acid sequence. Mutations reported in previous literature in  
509 other species are indicated and color coded by species; these mutations were either selected by  
510 aminoglycoside treatment *in vitro* or selected by another antibiotic and subsequently  
511 demonstrated to confer resistance to aminoglycosides. Mutations reported in whole genome  
512 sequencing datasets of *P. aeruginosa* clinical isolates are indicated. SNPs are indicated by a  
513 circle, insertions or deletions (indels) are indicated by a triangle, and stop codon mutations are  
514 indicated by an asterisk. Top: *fusA1* gene, Middle: *ptsP* gene, Bottom: *cyoA* and *cyoB* genes.  
515 Referenced literature: 1. Jahn et al., 2017, 2. Ibacache-Quiroga et al., 2018, 3. Mogre et al.,  
516 2014, 4. Kim et al., 2014, 5. Norström et al., 2007, 6. Johanson and Hughes, 1994, 7. López-  
517 Causapé et al., 2017, 8. Markussen et al., 2014, 9. Chung et al., 2012, 10. Bolard et al., 2017,  
518 11. López-Causapé et al., 2018

519

520

## 521 **References**

- 522 Ahmed, M.N., Porse, A., Sommer, M.O.A., Høiby, N., and Ciofu, O. (2018a). Evolution of  
523 Antibiotic Resistance in Biofilm and Planktonic *Pseudomonas aeruginosa* Populations Exposed  
524 to Subinhibitory Levels of Ciprofloxacin. *Antimicrob Agents Chemother* 62.
- 525 Ahmed, M.N., Porse, A., Sommer, M.O.A., Høiby, N., and Ciofu, O. (2018b). Evolution of  
526 antibiotic resistance in biofilm and planktonic *P. aeruginosa* populations exposed to sub-  
527 inhibitory levels of ciprofloxacin. *Antimicrob. Agents Chemother.* AAC.00320-18.
- 528 Baumann, P., Doudoroff, M., and Stanier, R.Y. (1968). Study of the *Moraxella* Group I. Genus  
529 *Moraxella* and the *Neisseria catarrhalis* Group. *Journal of Bacteriology* 95, 58–73.
- 530 Baym, M., Kryazhimskiy, S., Lieberman, T.D., Chung, H., Desai, M.M., and Kishony, R. (2015).  
531 Inexpensive Multiplexed Library Preparation for Megabase-Sized Genomes. *PLOS ONE* 10,  
532 e0128036.
- 533 Bolard, A., Plesiat, P., and Jeannot, K. (2017). Mutations in gene *fusA1* as a novel mechanism  
534 of aminoglycoside resistance in clinical strains of *Pseudomonas aeruginosa*. *Antimicrob. Agents*  
535 *Chemother.* AAC.01835-17.
- 536 Bradley, P., Gordon, N.C., Walker, T.M., Dunn, L., Heys, S., Huang, B., Earle, S., Pankhurst,  
537 L.J., Anson, L., de Cesare, M., et al. (2015). Rapid antibiotic-resistance predictions from  
538 genome sequence data for *Staphylococcus aureus* and *Mycobacterium tuberculosis*. *Nature*  
539 *Communications* 6, 10063.
- 540 Breen, M.S., Kemena, C., Vlasov, P.K., Notredame, C., and Kondrashov, F.A. (2012). Epistasis  
541 as the primary factor in molecular evolution. *Nature* 490, 535–538.
- 542 Brockhurst, M.A., Harrison, F., Veening, J.-W., Harrison, E., Blackwell, G., Iqbal, Z., and  
543 Maclean, C. (2019). Assessing evolutionary risks of resistance for new antimicrobial therapies.  
544 *Nature Ecology & Evolution* 3, 515–517.
- 545 Bryan, L.E., and Kwan, S. (1983). Roles of ribosomal binding, membrane potential, and electron  
546 transport in bacterial uptake of streptomycin and gentamicin. *Antimicrob Agents Chemother* 23,  
547 835–845.
- 548 Bryan, L.E., O'Hara, K., and Wong, S. (1984). Lipopolysaccharide changes in impermeability-  
549 type aminoglycoside resistance in *Pseudomonas aeruginosa*. *Antimicrob Agents Chemother* 26,  
550 250–255.
- 551 Bulitta, J.B., Ly, N.S., Landersdorfer, C.B., Wanigaratne, N.A., Velkov, T., Yadav, R., Oliver, A.,  
552 Martin, L., Shin, B.S., Forrest, A., et al. (2015). Two Mechanisms of Killing of *Pseudomonas*  
553 *aeruginosa* by Tobramycin Assessed at Multiple Inocula via Mechanism-Based Modeling.  
554 *Antimicrob. Agents Chemother.* 59, 2315–2327.
- 555 Burrows, L.L., Charter, D.F., and Lam, J.S. (1996). Molecular characterization of the  
556 *Pseudomonas aeruginosa* serotype O5 (PAO1) B-band lipopolysaccharide gene cluster.  
557 *Molecular Microbiology* 22, 481–495.

- 558 Chmiel, J.F., Aksamit, T.R., Chotirmall, S.H., Dasenbrook, E.C., Elborn, J.S., LiPuma, J.J.,  
559 Ranganathan, S.C., Waters, V.J., and Ratjen, F.A. (2014). Antibiotic Management of Lung  
560 Infections in Cystic Fibrosis. I. The Microbiome, Methicillin-Resistant *Staphylococcus aureus*,  
561 Gram-Negative Bacteria, and Multiple Infections. *Annals ATS* 11, 1120–1129.
- 562 Chung, J.C.S., Becq, J., Fraser, L., Schulz-Trieglaff, O., Bond, N.J., Foweraker, J., Bruce, K.D.,  
563 Smith, G.P., and Welch, M. (2012). Genomic Variation among Contemporary *Pseudomonas*  
564 *aeruginosa* Isolates from Chronically Infected Cystic Fibrosis Patients. *J Bacteriol* 194, 4857–  
565 4866.
- 566 CLSI (2019). Performance Standards for Antimicrobial Susceptibility Testing (Wayne, PA:  
567 Clinical and Laboratory Standards Institute).
- 568 Cooper, V.S. (2018). Experimental Evolution as a High-Throughput Screen for Genetic  
569 Adaptations. *MSphere* 3, e00121-18.
- 570 Damper, P.D., and Epstein, W. (1981). Role of the membrane potential in bacterial resistance to  
571 aminoglycoside antibiotics. *Antimicrob Agents Chemother* 20, 803–808.
- 572 Dettman, J.R., Sztepanacz, J.L., and Kassen, R. (2016). The properties of spontaneous  
573 mutations in the opportunistic pathogen *Pseudomonas aeruginosa*. *BMC Genomics* 17.
- 574 Eze, E.C., Chenia, H.Y., and Zowalaty, M.E.E. (2018). *Acinetobacter baumannii* biofilms: effects  
575 of physicochemical factors, virulence, antibiotic resistance determinants, gene regulation, and  
576 future antimicrobial treatments. *Infect Drug Resist* 11, 2277–2299.
- 577 Fàbrega, A., Madurga, S., Giralt, E., and Vila, J. (2009). Mechanism of action of and resistance  
578 to quinolones. *Microb Biotechnol* 2, 40–61.
- 579 Feng, Y., Jonker, M.J., Moustakas, I., Brul, S., and ter Kuile, B.H. (2016). Dynamics of  
580 Mutations during Development of Resistance by *Pseudomonas aeruginosa* against Five  
581 Antibiotics. *Antimicrob Agents Chemother* 60, 4229–4236.
- 582 Gebhardt, M.J., and Shuman, H.A. (2017). *GigA* and *GigB* are Master Regulators of Antibiotic  
583 Resistance, Stress Responses, and Virulence in *Acinetobacter baumannii*. *J Bacteriol* 199.
- 584 Gifford, D.R., Furió, V., Papkou, A., Vogwill, T., Oliver, A., and MacLean, R.C. (2018).  
585 Identifying and exploiting genes that potentiate the evolution of antibiotic resistance. *Nature*  
586 *Ecology & Evolution* 2, 1033.
- 587 Hall, C.W., and Mah, T.-F. (2017). Molecular mechanisms of biofilm-based antibiotic resistance  
588 and tolerance in pathogenic bacteria. *FEMS Microbiol Rev* 41, 276–301.
- 589 Høiby, N., Bjarnsholt, T., Givskov, M., Molin, S., and Ciofu, O. (2010). Antibiotic resistance of  
590 bacterial biofilms. *International Journal of Antimicrobial Agents* 35, 322–332.
- 591 Ibacache-Quiroga, C., Oliveros, J.C., Couce, A., and Blázquez, J. (2018). Parallel Evolution of  
592 High-Level Aminoglycoside Resistance in *Escherichia coli* Under Low and High Mutation Supply  
593 Rates. *Front. Microbiol.* 9.

- 594 Jahn, L.J., Munck, C., Ellabaan, M.M.H., and Sommer, M.O.A. (2017). Adaptive Laboratory  
595 Evolution of Antibiotic Resistance Using Different Selection Regimes Lead to Similar  
596 Phenotypes and Genotypes. *Front Microbiol* 8.
- 597 Johanson, U., and Hughes, D. (1994). Fusidic acid-resistant mutants define three regions in  
598 elongation factor G of *Salmonella typhimurium*. *Gene* 143, 55–59.
- 599 Jones, A.K., Woods, A.L., Takeoka, K.T., Shen, X., Wei, J.-R., Caughlan, R.E., and Dean, C.R.  
600 (2017). Determinants of Antibacterial Spectrum and Resistance Potential of the Elongation  
601 Factor G Inhibitor Argyrin B in Key Gram-Negative Pathogens. *Antimicrobial Agents and*  
602 *Chemotherapy* 61, e02400-16.
- 603 Kadurugamuwa, J.L., Lam, J.S., and Beveridge, T.J. (1993). Interaction of gentamicin with the A  
604 band and B band lipopolysaccharides of *Pseudomonas aeruginosa* and its possible lethal effect.  
605 *Antimicrob Agents Chemother* 37, 715–721.
- 606 Kim, S., Lieberman, T.D., and Kishony, R. (2014). Alternating antibiotic treatments constrain  
607 evolutionary paths to multidrug resistance. *Proceedings of the National Academy of Sciences*  
608 111, 14494–14499.
- 609 Kohanski, M.A., Dwyer, D.J., and Collins, J.J. (2010). How antibiotics kill bacteria: from targets  
610 to networks. *Nat Rev Microbiol* 8, 423–435.
- 611 Kryazhimskiy, S., Rice, D.P., Jerison, E.R., and Desai, M.M. (2014). Global epistasis makes  
612 adaptation predictable despite sequence-level stochasticity. *Science* 344, 1519–1522.
- 613 Lässig, M., Mustonen, V., and Walczak, A.M. (2017). Predicting evolution. *Nature Ecology &*  
614 *Evolution* 1, 0077.
- 615 Long, H., Sung, W., Miller, S.F., Ackerman, M.S., Doak, T.G., and Lynch, M. (2014). Mutation  
616 Rate, Spectrum, Topology, and Context-Dependency in the DNA Mismatch Repair-Deficient  
617 *Pseudomonas fluorescens* ATCC948. *Genome Biol Evol* 7, 262–271.
- 618 López-Causapé, C., Sommer, L.M., Cabot, G., Rubio, R., Ocampo-Sosa, A.A., Johansen, H.K.,  
619 Figuerola, J., Cantón, R., Kidd, T.J., Molin, S., et al. (2017). Evolution of the *Pseudomonas*  
620 *aeruginosa* mutational resistome in an international Cystic Fibrosis clone. *Sci Rep* 7.
- 621 López-Causapé, C., Rubio, R., Cabot, G., and Oliver, A. (2018). Evolution of the *Pseudomonas*  
622 *aeruginosa* Aminoglycoside Mutational Resistome In Vitro and in the Cystic Fibrosis Setting.  
623 *Antimicrob. Agents Chemother.* 62, e02583-17.
- 624 MacLean, R.C., and Buckling, A. (2009). The Distribution of Fitness Effects of Beneficial  
625 Mutations in *Pseudomonas aeruginosa*. *PLoS Genetics* 5, e1000406.
- 626 MacLean, R.C., Perron, G.G., and Gardner, A. (2010). Diminishing Returns From Beneficial  
627 Mutations and Pervasive Epistasis Shape the Fitness Landscape for Rifampicin Resistance in  
628 *Pseudomonas aeruginosa*. *Genetics* 186, 1345–1354.
- 629 Markussen, T., Marvig, R.L., Gómez-Lozano, M., Aanæs, K., Burleigh, A.E., Høiby, N.,  
630 Johansen, H.K., Molin, S., and Jelsbak, L. (2014). Environmental Heterogeneity Drives Within-  
631 Host Diversification and Evolution of *Pseudomonas aeruginosa*. *MBio* 5, e01592-14.



- 632 McCall, I.C., Shah, N., Govindan, A., Baquero, F., and Levin, B.R. (2019). Antibiotic Killing of  
633 Diversely Generated Populations of Nonreplicating Bacteria. *Antimicrobial Agents and*  
634 *Chemotherapy* 63, e02360-18.
- 635 Mogre, A., Sengupta, T., Veetil, R.T., Ravi, P., and Seshasayee, A.S.N. (2014). Genomic  
636 Analysis Reveals Distinct Concentration-Dependent Evolutionary Trajectories for Antibiotic  
637 Resistance in *Escherichia coli*. *DNA Res* 21, 711–726.
- 638 Mulcahy, L.R., Isabella, V.M., and Lewis, K. (2014). *Pseudomonas aeruginosa* biofilms in  
639 disease. *Microb Ecol* 68, 1–12.
- 640 Norström, T., Lannergård, J., and Hughes, D. (2007). Genetic and Phenotypic Identification of  
641 Fusidic Acid-Resistant Mutants with the Small-Colony-Variant Phenotype in *Staphylococcus*  
642 *aureus*. *Antimicrob Agents Chemother* 51, 4438–4446.
- 643 Palmer, A.C., and Kishony, R. (2013). Understanding, predicting and manipulating the genotypic  
644 evolution of antibiotic resistance. *Nat Rev Genet* 14, 243–248.
- 645 Palmer, K.L., Aye, L.M., and Whiteley, M. (2007). Nutritional Cues Control *Pseudomonas*  
646 *aeruginosa* Multicellular Behavior in Cystic Fibrosis Sputum. *J. Bacteriol.* 189, 8079–8087.
- 647 Palmer, S.O., Rangel, E.Y., Hu, Y., Tran, A.T., and Bullard, J.M. (2013). Two Homologous EF-G  
648 Proteins from *Pseudomonas aeruginosa* Exhibit Distinct Functions. *PLOS ONE* 8, e80252.
- 649 Piechaud, M., and Second, L. (1951). [Studies of 26 strains of *Moraxella lwoffii*]. *Ann Inst*  
650 *Pasteur (Paris)* 80, 97–99.
- 651 Poltak, S.R., and Cooper, V.S. (2011). Ecological succession in long-term experimentally  
652 evolved biofilms produces synergistic communities. *ISME J* 5, 369–378.
- 653 Rahme, L.G., Stevens, E.J., Wolfort, S.F., Shao, J., Tompkins, R.G., and Ausubel, F.M. (1995).  
654 Common virulence factors for bacterial pathogenicity in plants and animals. *Science* 268, 1899–  
655 1902.
- 656 Rocchetta, H.L., Burrows, L.L., and Lam, J.S. (1999). Genetics of O-Antigen Biosynthesis  
657 in *Pseudomonas aeruginosa*. *Microbiol. Mol. Biol. Rev.* 63, 523–553.
- 658 Santajit, S., and Indrawattana, N. (2016). Mechanisms of Antimicrobial Resistance in ESKAPE  
659 Pathogens. *Biomed Res Int* 2016.
- 660 Santos-Lopez, A., Marshall, C.W., Scribner, M.R., Snyder, D., and Cooper, V.S. (2019). Biofilm-  
661 dependent evolutionary pathways to antibiotic resistance. *BioRxiv* 581611.
- 662 Sanz-García, F., Hernando-Amado, S., and Martínez, J.L. (2018). Mutational Evolution of  
663 *Pseudomonas aeruginosa* Resistance to Ribosome-Targeting Antibiotics. *Front Genet* 9.
- 664 Savelsbergh, A., Rodnina, M.V., and Wintermeyer, W. (2009). Distinct functions of elongation  
665 factor G in ribosome recycling and translocation. *RNA* 15, 772–780.

- 666 Schurek, K.N., Marr, A.K., Taylor, P.K., Wiegand, I., Semene, L., Khaira, B.K., and Hancock,  
667 R.E.W. (2008). Novel Genetic Determinants of Low-Level Aminoglycoside Resistance in  
668 *Pseudomonas aeruginosa*. *Antimicrob Agents Chemother* 52, 4213–4219.
- 669 Tamma, P.D., Fan, Y., Bergman, Y., Perte, G., Kazmi, A.Q., Lewis, S., Carroll, K.C., Schatz,  
670 M.C., Timp, W., and Simner, P.J. (2019). Applying Rapid Whole-Genome Sequencing To  
671 Predict Phenotypic Antimicrobial Susceptibility Testing Results among Carbapenem-Resistant  
672 *Klebsiella pneumoniae* Clinical Isolates. *Antimicrobial Agents and Chemotherapy* 63, e01923-  
673 18.
- 674 Tognon, M., Köhler, T., Gdaniec, B.G., Hao, Y., Lam, J.S., Beaume, M., Luscher, A., Buckling,  
675 A., and van Delden, C. (2017). Co-evolution with *Staphylococcus aureus* leads to  
676 lipopolysaccharide alterations in *Pseudomonas aeruginosa*. *ISME J* 11, 2233–2243.
- 677 Trampari, E., Holden, E.R., Wickham, G.J., Ravi, A., Prischi, F., de Oliveira Martins, L., Savva,  
678 G.M., Bavro, V.N., and Webber, M.A. (2019). Antibiotics select for novel pathways of resistance  
679 in biofilms. *BioRxiv*.
- 680 Vogwill, T., Kojadinovic, M., Furió, V., and MacLean, R.C. (2014). Testing the Role of Genetic  
681 Background in Parallel Evolution Using the Comparative Experimental Evolution of Antibiotic  
682 Resistance. *Mol Biol Evol* 31, 3314–3323.
- 683 Vogwill, T., Kojadinovic, M., and MacLean, R.C. (2016). Epistasis between antibiotic resistance  
684 mutations and genetic background shape the fitness effect of resistance across species of  
685 *Pseudomonas*. *Proc. Biol. Sci.* 283.
- 686 Wang, Y., Arenas, C.D., Stoebel, D.M., Flynn, K., Knapp, E., Dillon, M.M., Wünsche, A.,  
687 Hatcher, P.J., Moore, F.B.-G., Cooper, V.S., et al. (2016). Benefit of transferred mutations is  
688 better predicted by the fitness of recipients than by their ecological or genetic relatedness.  
689 *PNAS* 113, 5047–5052.
- 690 Ward, H., Perron, G.G., and Maclean, R.C. (2009). The cost of multiple drug resistance in  
691 *Pseudomonas aeruginosa*. *Journal of Evolutionary Biology* 22, 997–1003.
- 692 Wattam, A.R., Davis, J.J., Assaf, R., Boisvert, S., Brettin, T., Bun, C., Conrad, N., Dietrich, E.M.,  
693 Disz, T., Gabbard, J.L., et al. (2017). Improvements to PATRIC, the all-bacterial Bioinformatics  
694 Database and Analysis Resource Center. *Nucleic Acids Res.* 45, D535–D542.
- 695 Wistrand-Yuen, E., Knopp, M., Hjort, K., Koskiniemi, S., Berg, O.G., and Andersson, D.I. (2018).  
696 Evolution of high-level resistance during low-level antibiotic exposure. *Nature Communications*  
697 9, 1599.
- 698 Wong, A., and Kassen, R. (2011). Parallel evolution and local differentiation in quinolone  
699 resistance in *Pseudomonas aeruginosa*. *Microbiology* 157, 937–944.
- 700 Wong, A., Rodrigue, N., and Kassen, R. (2012). Genomics of Adaptation during Experimental  
701 Evolution of the Opportunistic Pathogen *Pseudomonas aeruginosa*. *PLOS Genetics* 8,  
702 e1002928.
- 703

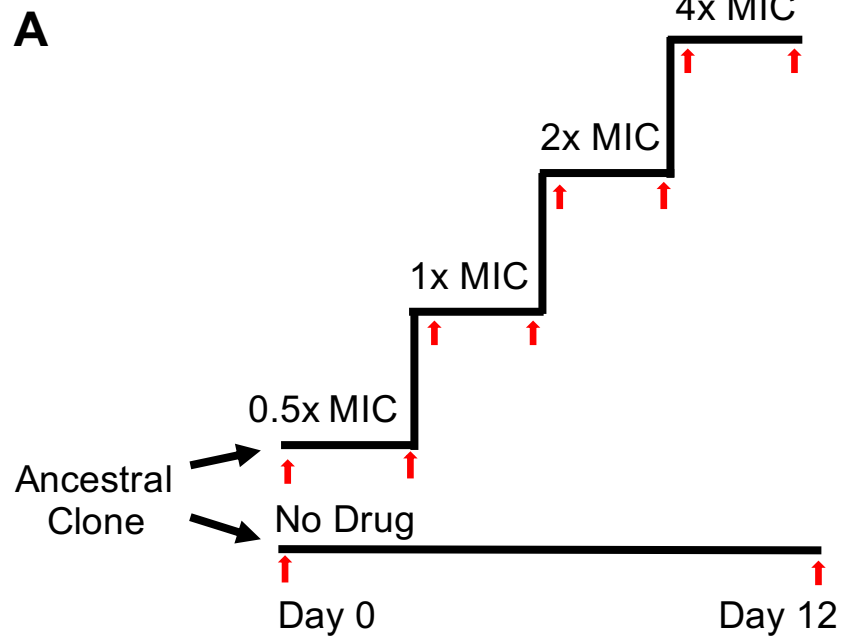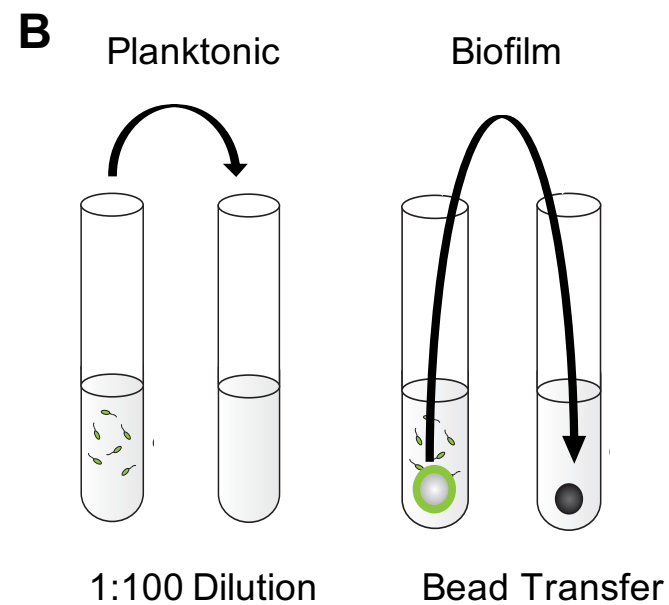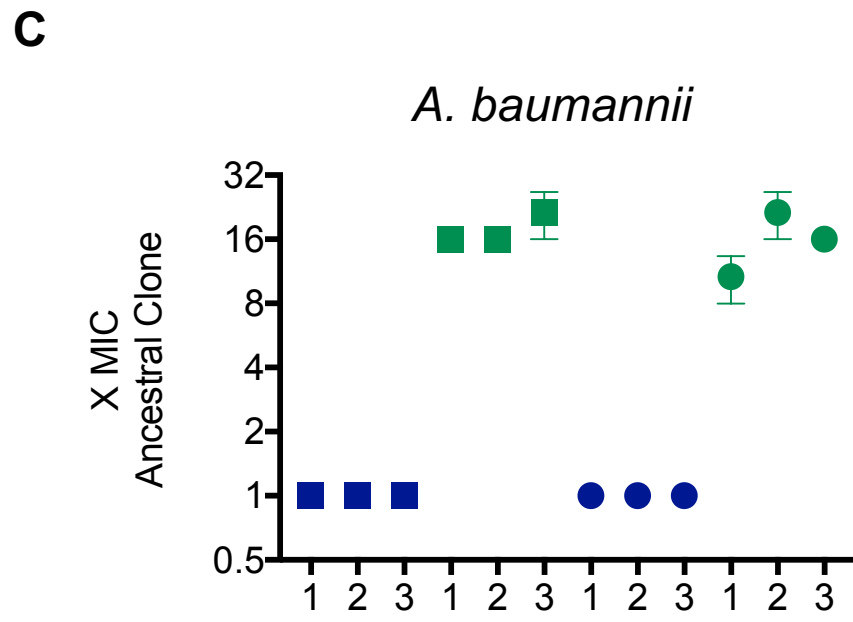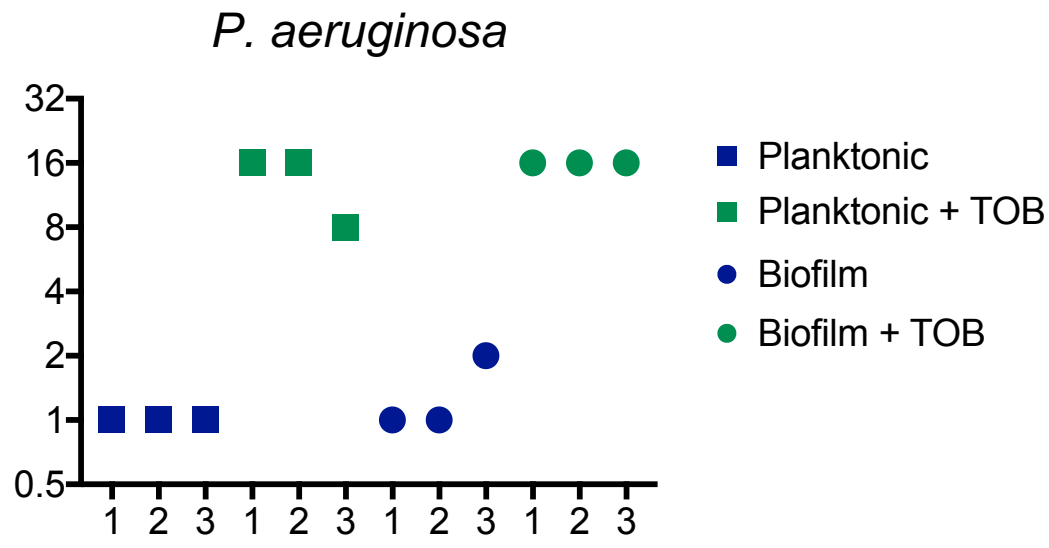

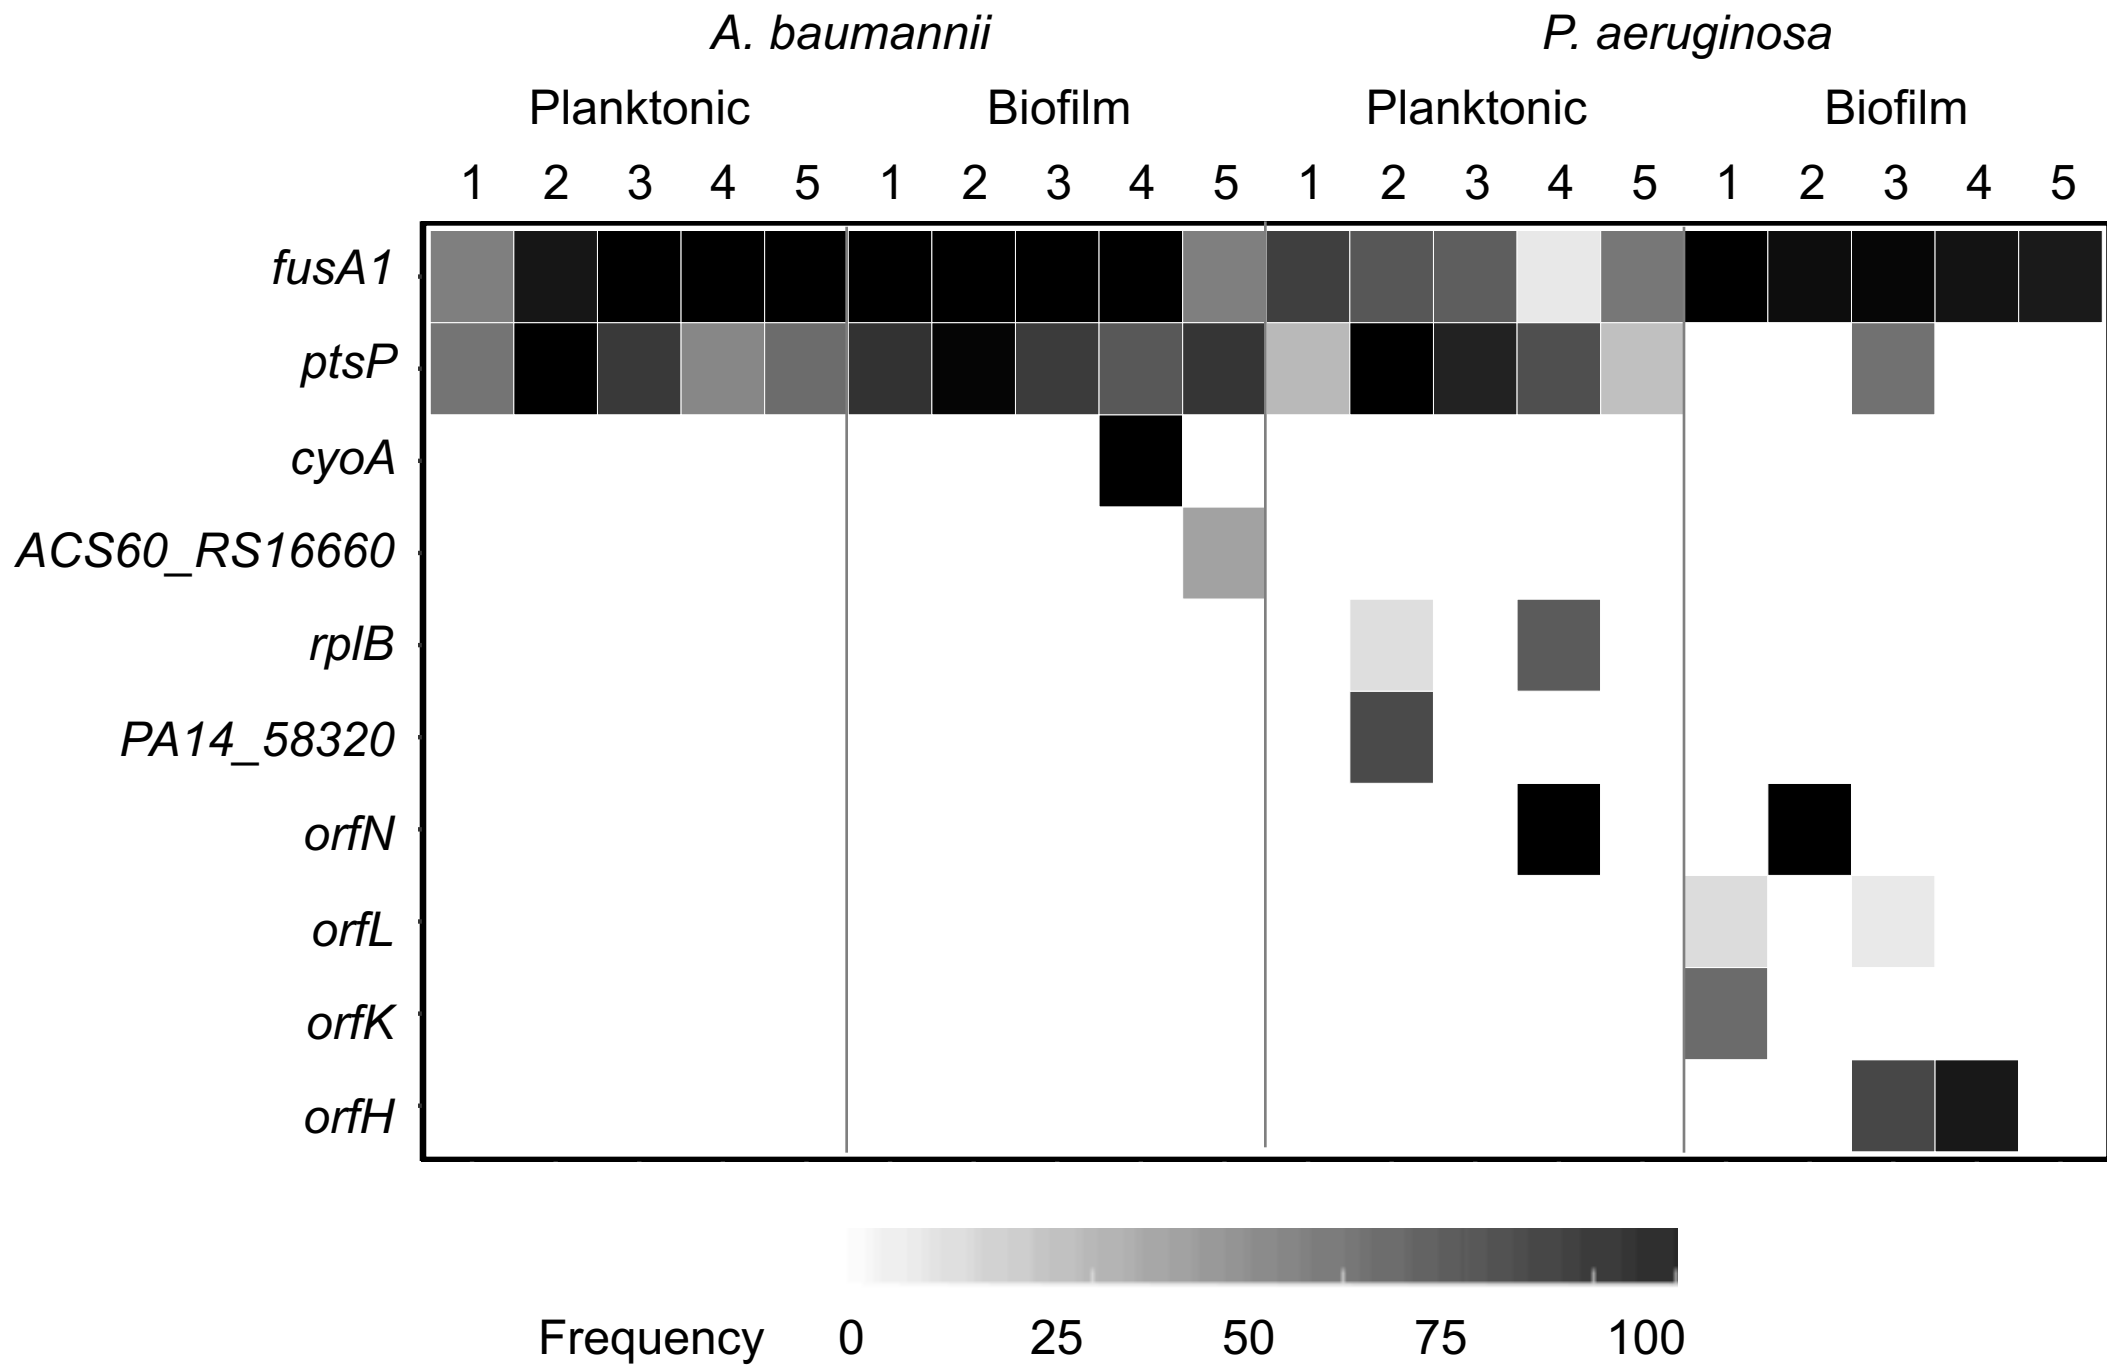

Planktonic

Biofilm

*A. baumannii*

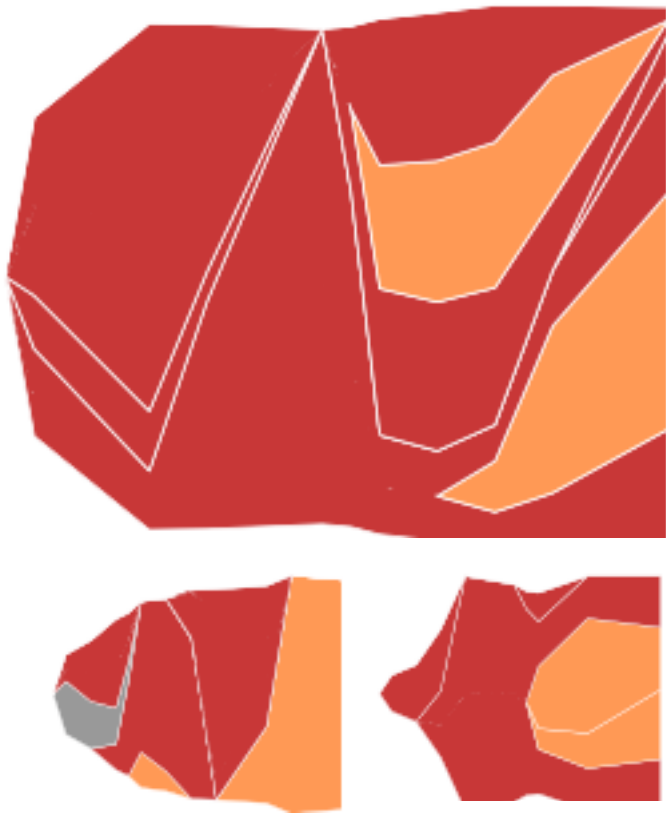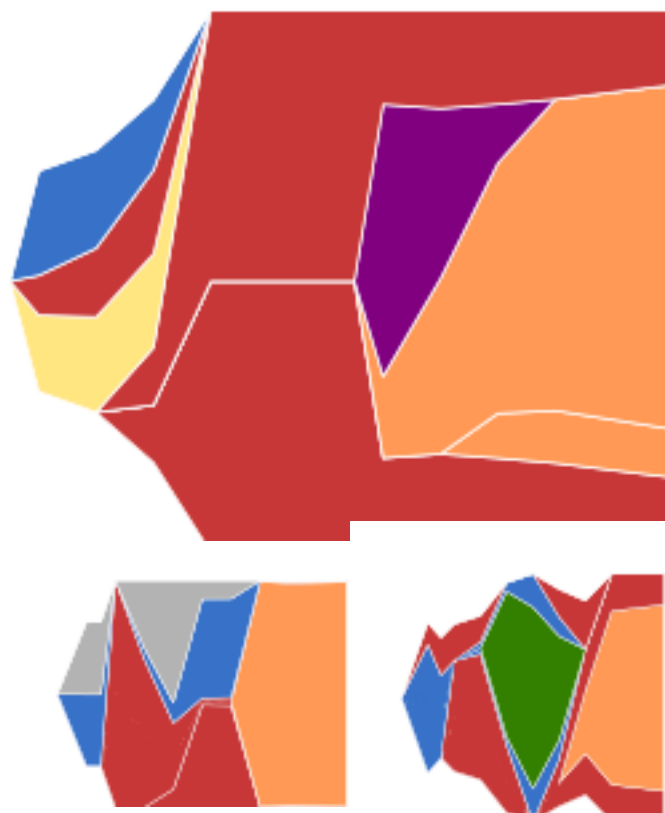

*P. aeruginosa*

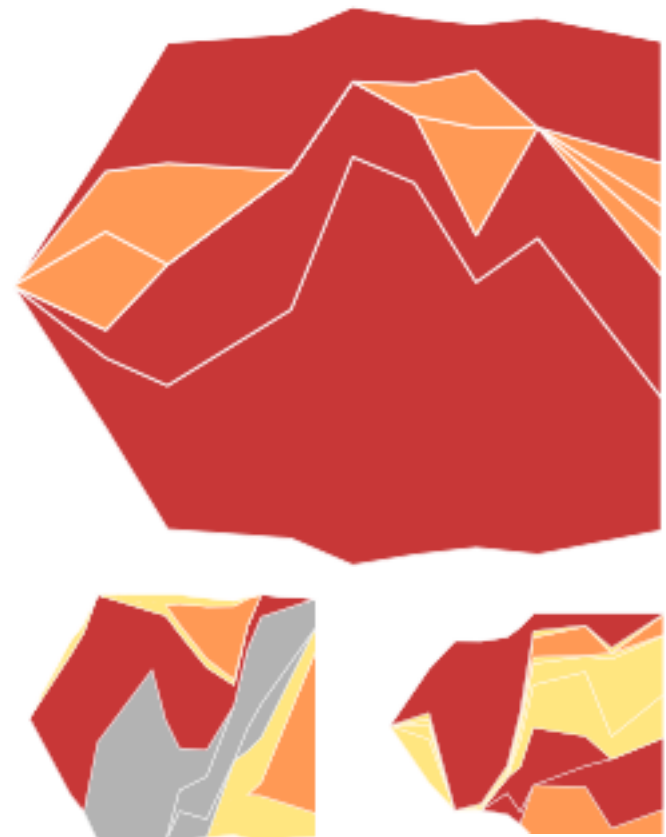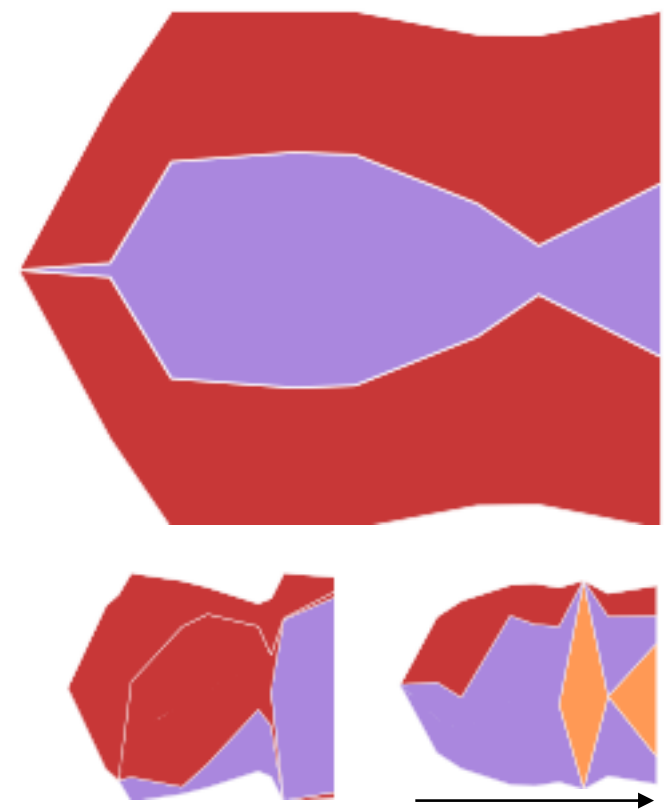

Time  
Genotype frequency

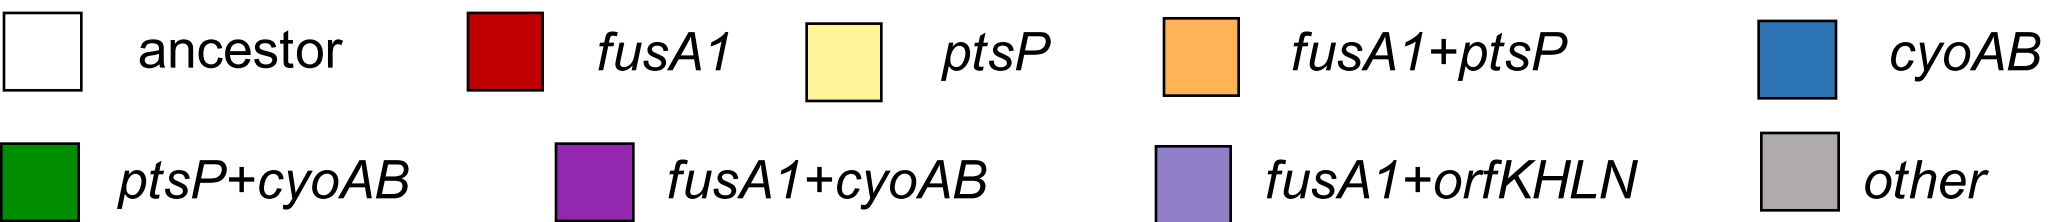

○ SNP  
 △ indel  
 \* stop codon

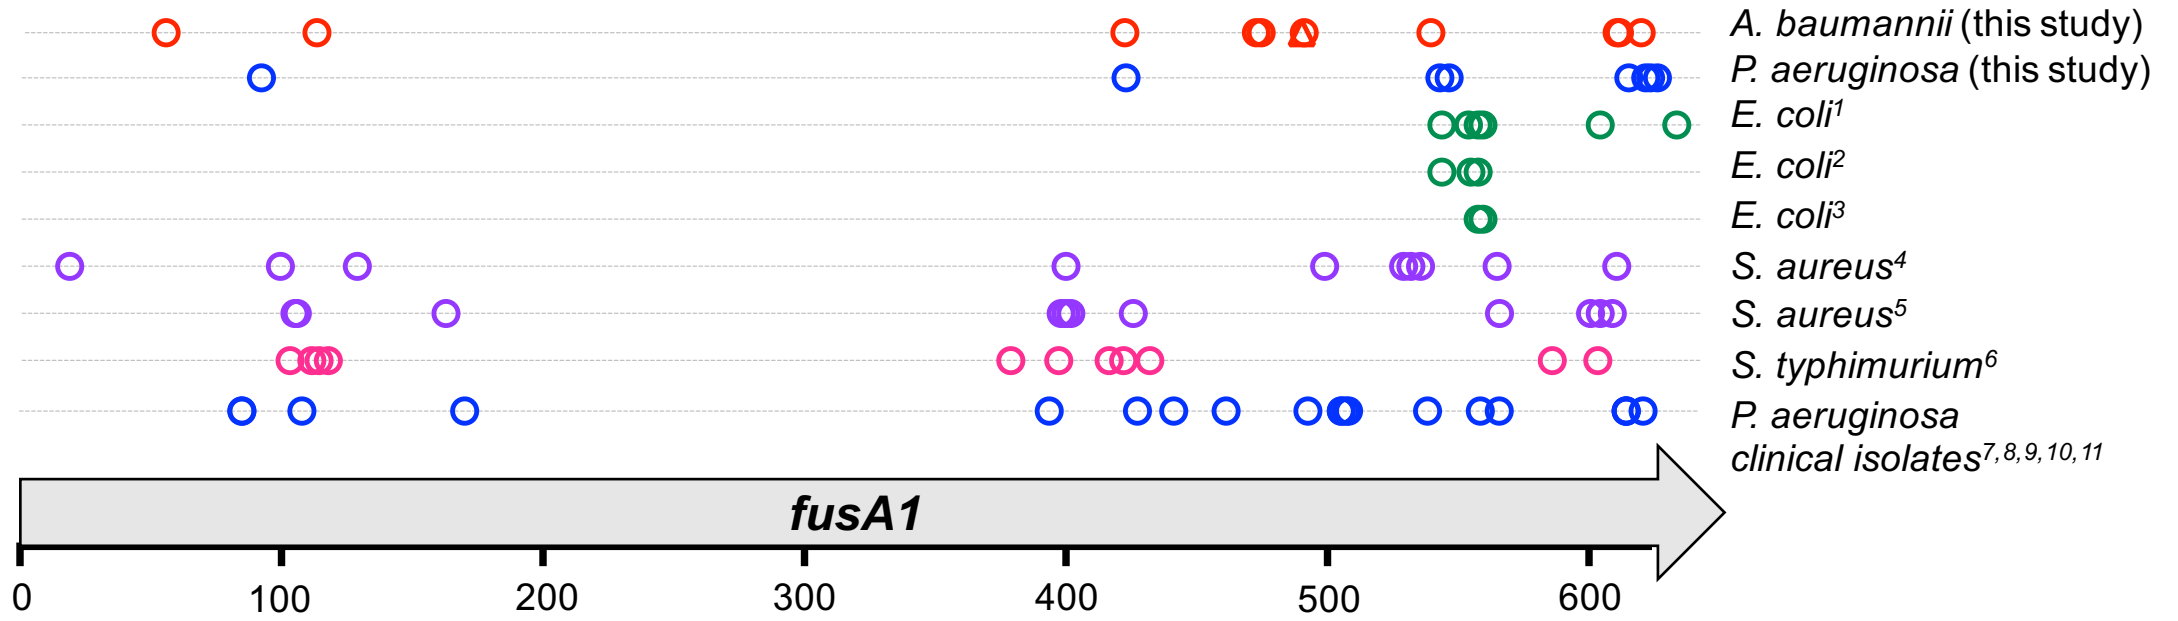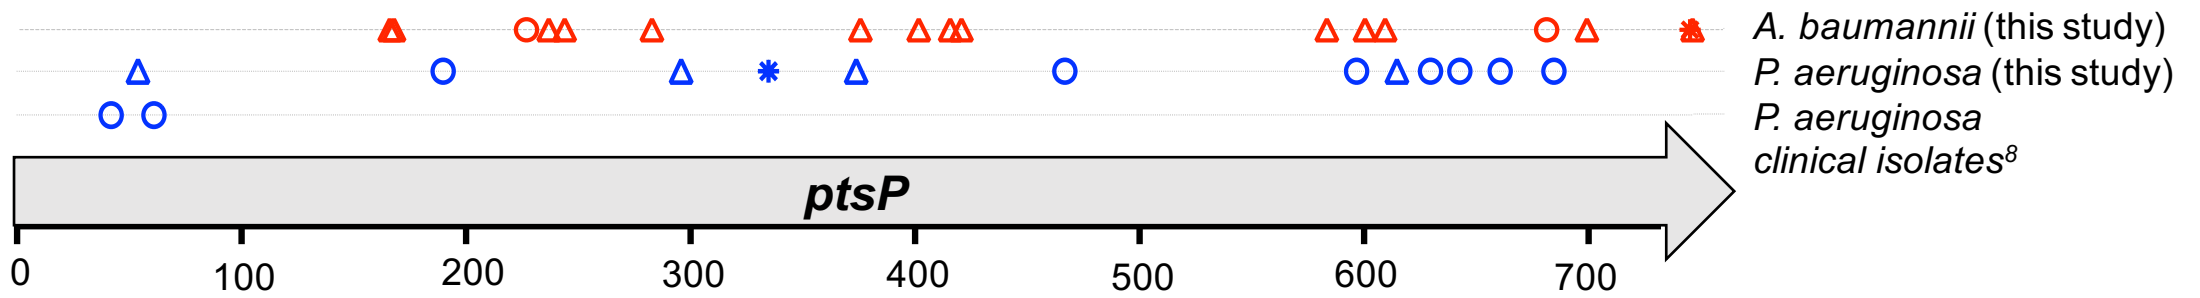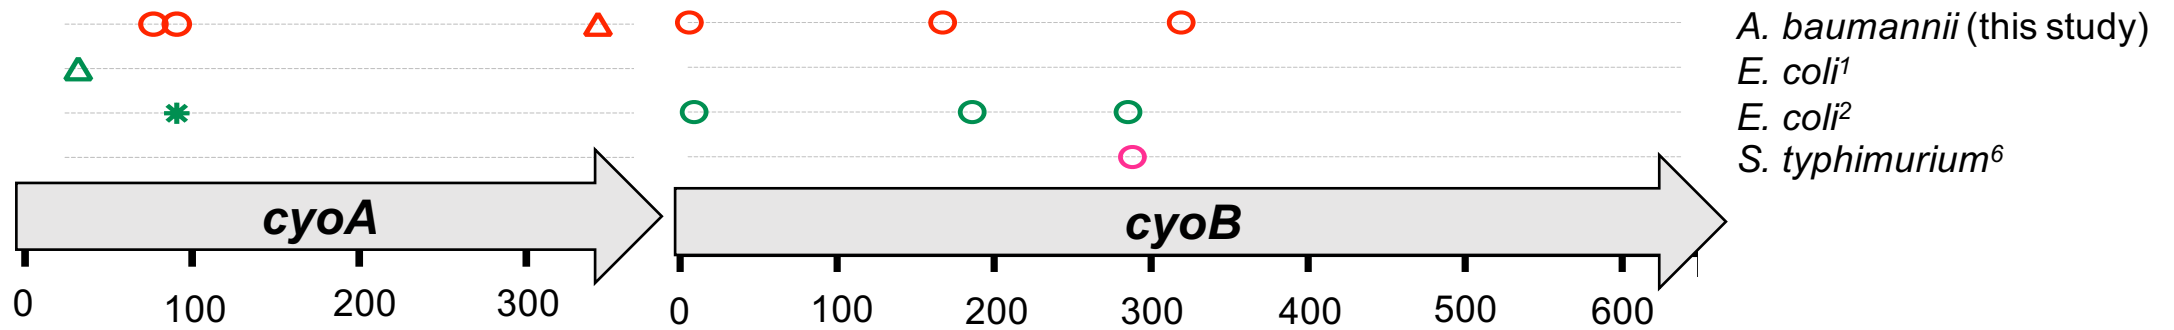

Source: http://biorxiv.org/content/10.1101/758979v1.full.pdf
